# Supplementary material for: EVI/WLS function is regulated by ubiquitylation and is linked to ER-associated degradation by ERLIN2
Source: PubMed Central journal article supplement (PMC8435288; doi:10.1242/jcs.257790), 2021-08-18
Supplement: joces-134-257790-s1.pdf [file joces-134-257790-s1.pdf]

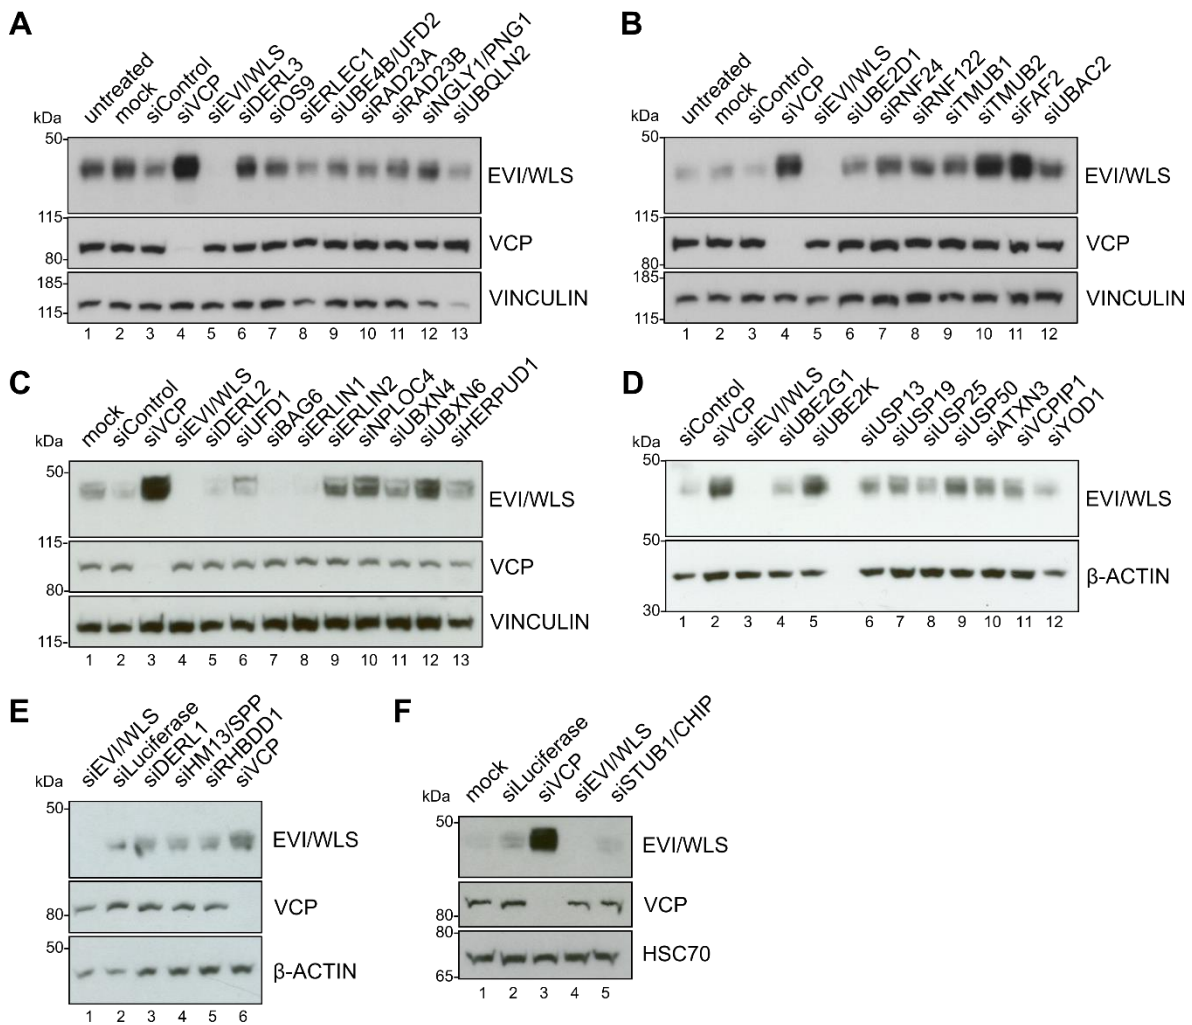

**Fig. S1. siRNA-based low-throughput screen identifies novel candidates involved in the degradation of EVI/WLS in HEK293T cells**

EVI/WLS protein levels were analysed after siRNA mediated knock-down of target genes. Increased EVI/WLS protein levels compared to siControl/siLuciferase treatment indicated the candidate's possible involvement in EVI/WLS's ERAD. HEK293T cells were harvested 72 h after transfection of the indicated siRNAs. VINCULIN, HSC70, or  $\beta$ -ACTIN served as loading controls. Western blots are representative of three independent experiments. kDa = kilodalton

Lanes 1-5 of **D** are also shown in Figure 1 and were not cut here to maintain integrity of the blot.

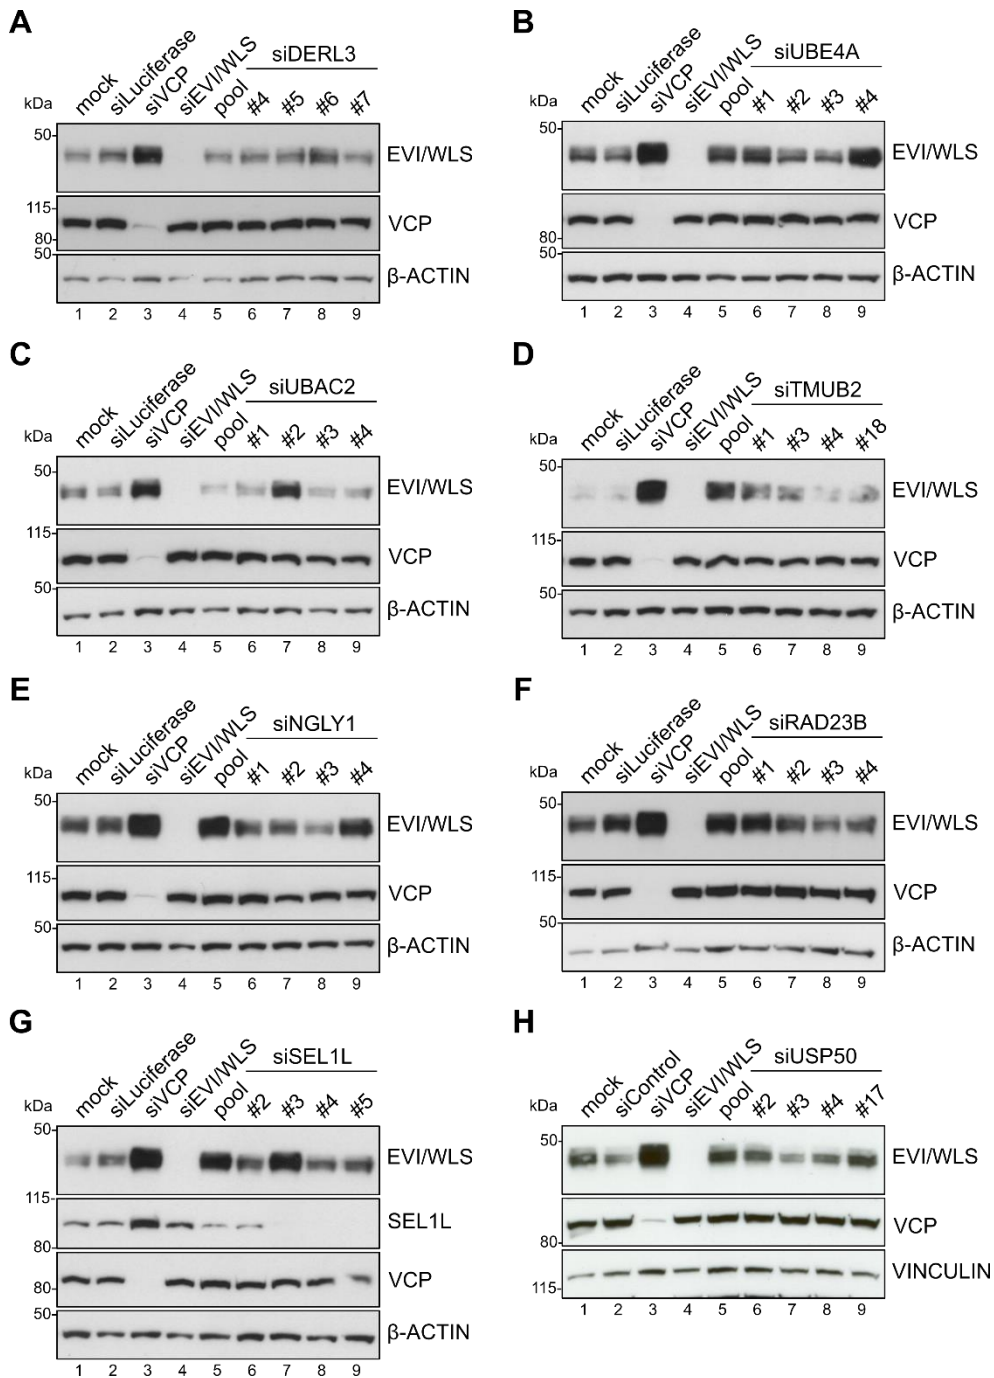

**Fig. S2. The knock-down of DERL3, UBE4A, UBAC2, TMUB2, NGLY1, RAD23B, SEL1L, or USP50 by single siRNAs did not show consistent upregulation of EVI/WLS**

EVI/WLS protein levels were not markedly elevated or varied between biological replicates after transfection of single or pooled siRNAs against the investigated candidates. HEK293T cells were harvested 72 h after transfection of the indicated siRNAs. Each gene's mRNA was targeted by either single siRNAs or an equimolar mix of all four respective siRNAs (pool) to analyse their effect on EVI/WLS protein level. VINCULIN or β-ACTIN served as loading control. Western blots are chosen from three independent experiments. kDa = kilodalton

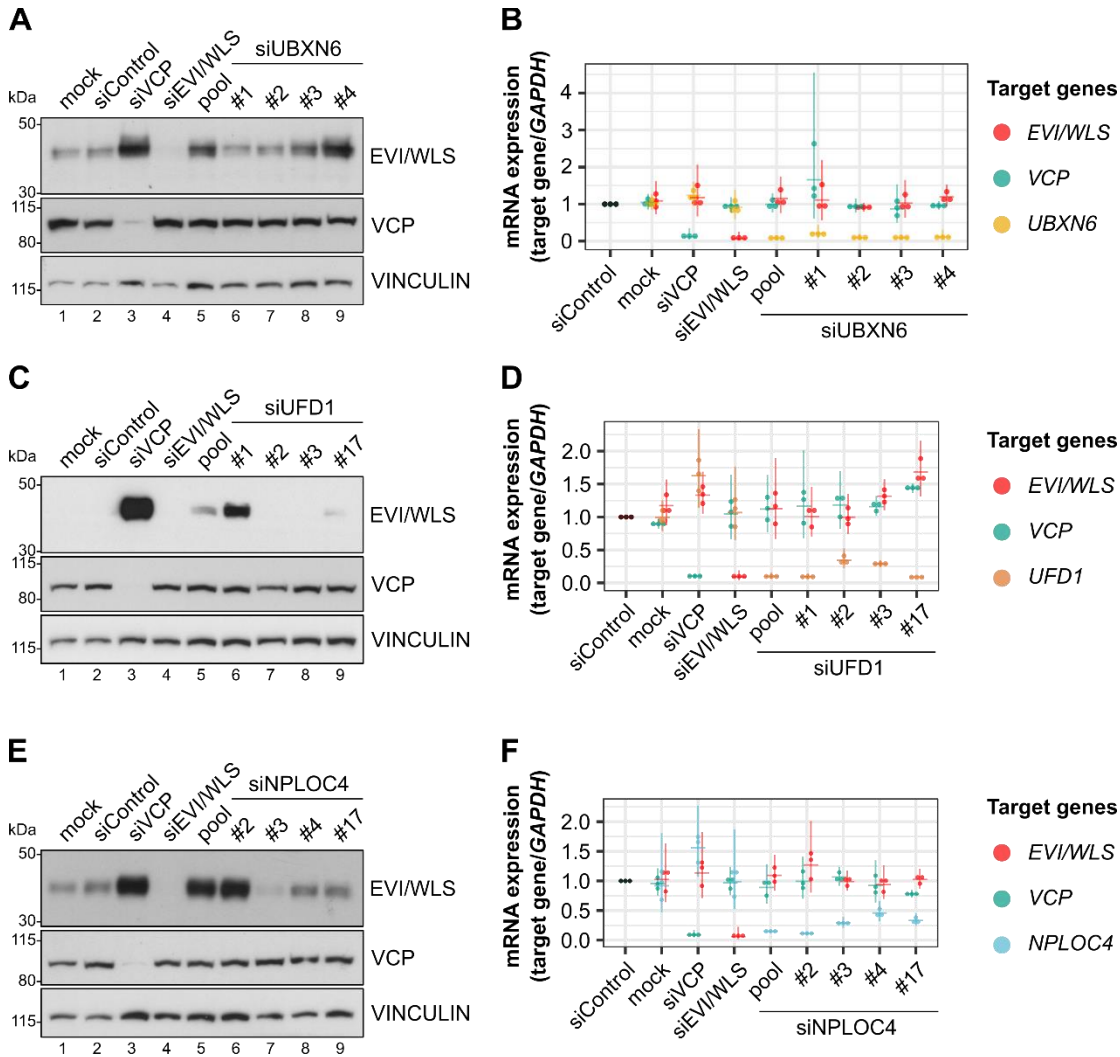

**Fig. S3. The knock-down of UBXXN6, UFD1, or NPLOC4 by single siRNAs did not show consistent upregulation of EVI/WLS**

EVI/WLS protein levels were not markedly elevated or varied between biological replicates after transfection of single or pooled siRNAs against the investigated candidates (**A**, **C**, **E**). mRNA expression analyses demonstrated mostly efficient gene silencing by pooled or single siRNAs with little effects on other investigated mRNAs (**B**, **D**, **F**).

HEK293T cells were harvested 72 h after transfection of the indicated siRNAs. Each gene's mRNA was targeted by either single siRNAs or an equimolecular mix of all four respective siRNAs (pool) to analyse their effect on EVI/WLS protein level or mRNA expression. **A**, **C**, **E**. Total cell lysates were analysed by SDS-PAGE and Western blotting for the specified proteins. VINCULIN served as loading control. Western blots are representative of three independent experiments. kDa = kilodalton

**B**, **D**, **F**. Total cellular RNA was transcribed to cDNA and used for mRNA expression analyses by RT-qPCR. Target gene expression was normalised to siControl treatment and *GAPDH* served as reference gene. Individual data points from three independent experiments are shown with mean and confidence intervals.

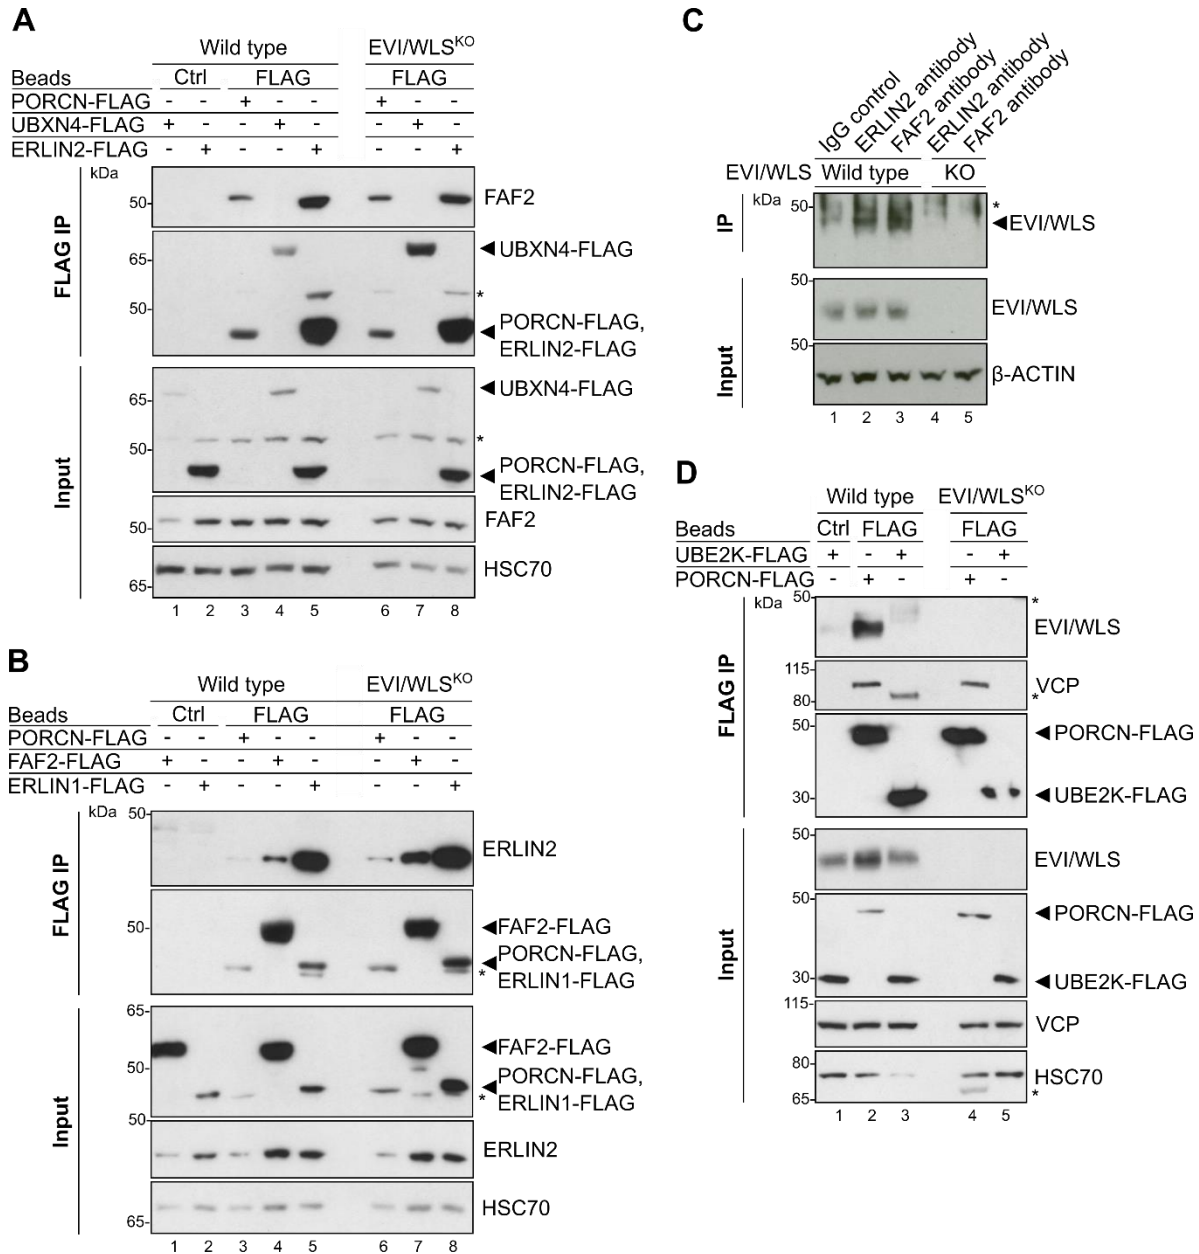

**Fig. S4. FAF2 and ERLIN2 interact with each other, but UBE2K and EVI/WLS do not**

**A, B.** Immunoprecipitation (IP) experiments confirmed that endogenous FAF2 and ERLIN2 interact with PORCN-FLAG and each other. Furthermore, endogenous ERLIN2 interacts with ERLIN1-FLAG. HEK293T wild type and EVI/WLS knock-out (EVI/WLS<sup>KO</sup>) cells were transfected with UBXN4-FLAG, ERLIN1-FLAG, ERLIN2-FLAG, FAF2-FLAG, or PORCN-FLAG overexpression plasmids. After 48 h, total cell lysates were sampled for input control or used for FLAG IP to precipitate FLAG-tagged proteins and their interaction partners. Asterisks mark signal from previous stainings. Results are representative of three independent experiments.

**C.** IP experiments confirmed that endogenous ERLIN2 and FAF2 interact with endogenous EVI/WLS. HEK293T wild type and EVI/WLS knock-out (EVI/WLS<sup>KO</sup>) cells were harvested and total cell lysates were sampled for input control or used for IP using antibodies to precipitate ERLIN2 or FAF2 proteins and their interaction partners. Asterisks mark signal from immunoglobulin heavy chains. Results are representative of three independent experiments.

**D.** The binding of endogenous EVI/WLS to UBE2K-FLAG could not be detected by IP. HEK293T wild type and EVI/WLS knock-out (EVI/WLS<sup>KO</sup>) cells were transfected with UBE2K-N-FLAG or PORCN-FLAG overexpression plasmids. After 48 h, total cell lysates were sampled for input control or used for FLAG IP to precipitate FLAG-tagged proteins and their interaction partners. Asterisks mark nonspecific signals. Results are representative of two independent experiments.

HSC70 or  $\beta$ -ACTIN served as loading control. kDa = kilodalton

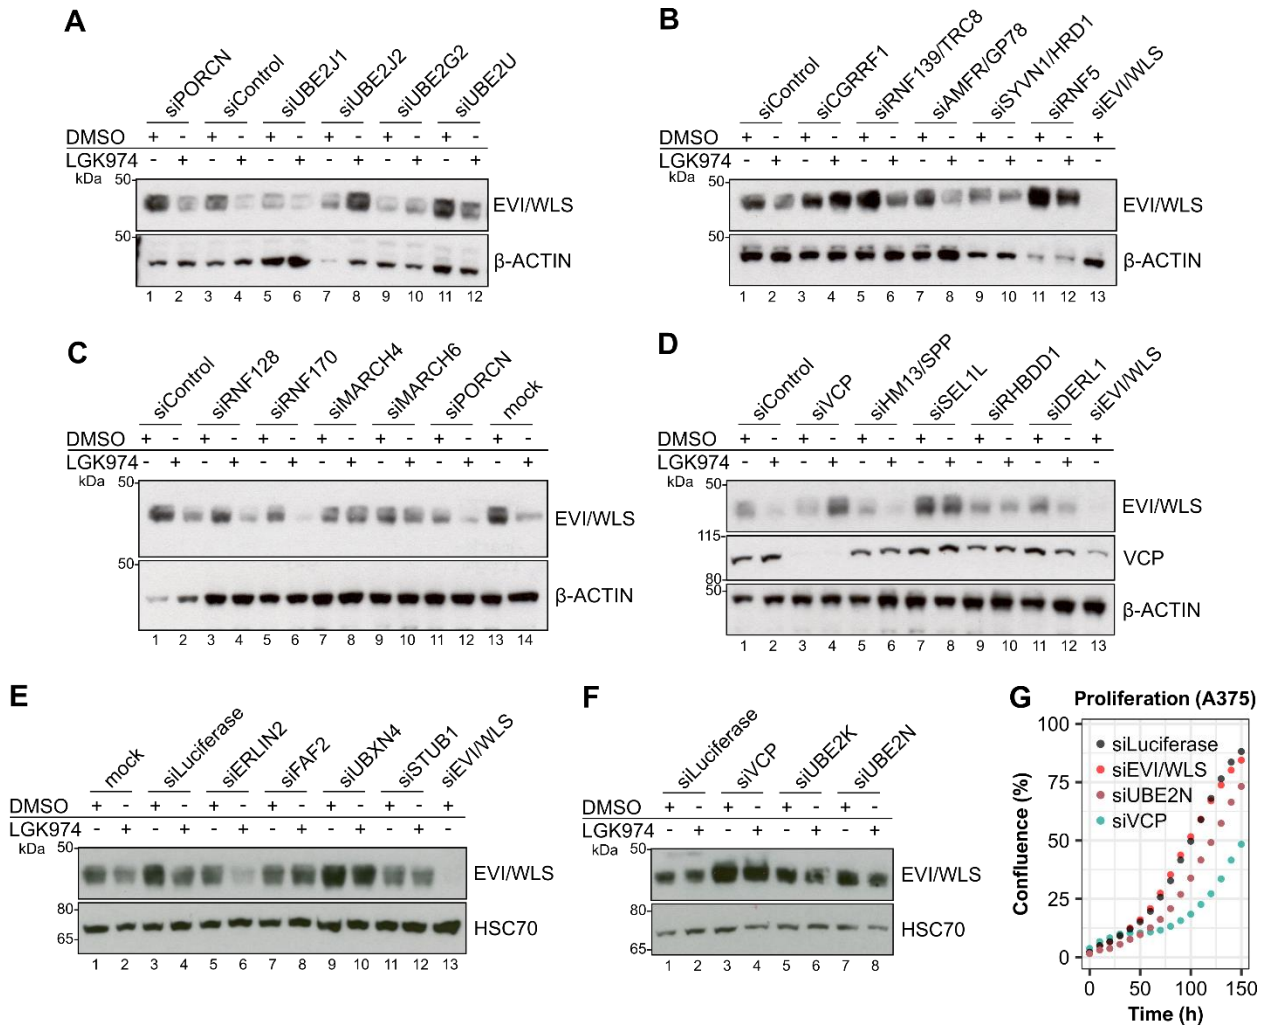

**Fig. S5. EVI/WLS is degraded with the help of VCP, CGRRF1, and UBE2J2 in A375 melanoma cells**

**A, B, C, D, E, F.** Knock-down of VCP, CGRRF1, or UBE2J2 prevented degradation of EVI/WLS after LGK974 treatment. A375 melanoma cells were treated with LGK974 (10  $\mu$ M) with daily medium changes. 24 h after addition of LGK974 cells were transfected with the indicated siRNAs. Again 72 h later, total cell lysates were analysed by SDS-PAGE and Western blotting for the specified proteins.  $\beta$ -ACTIN or HSC70 served as loading control. Western blots are representative of three independent experiments. kDa = kilodalton

**G.** A375 melanoma cell proliferation is reduced after transfection of siUBE2N or siVCP. Starting from 24 h after transfection of indicated siRNAs, proliferation was analysed by time-lapse live-cell imaging with the IncuCyte ZOOM system together with the IncuCyte Basic Software to determine total confluence of cells. Plot is representative of three independent experiments.

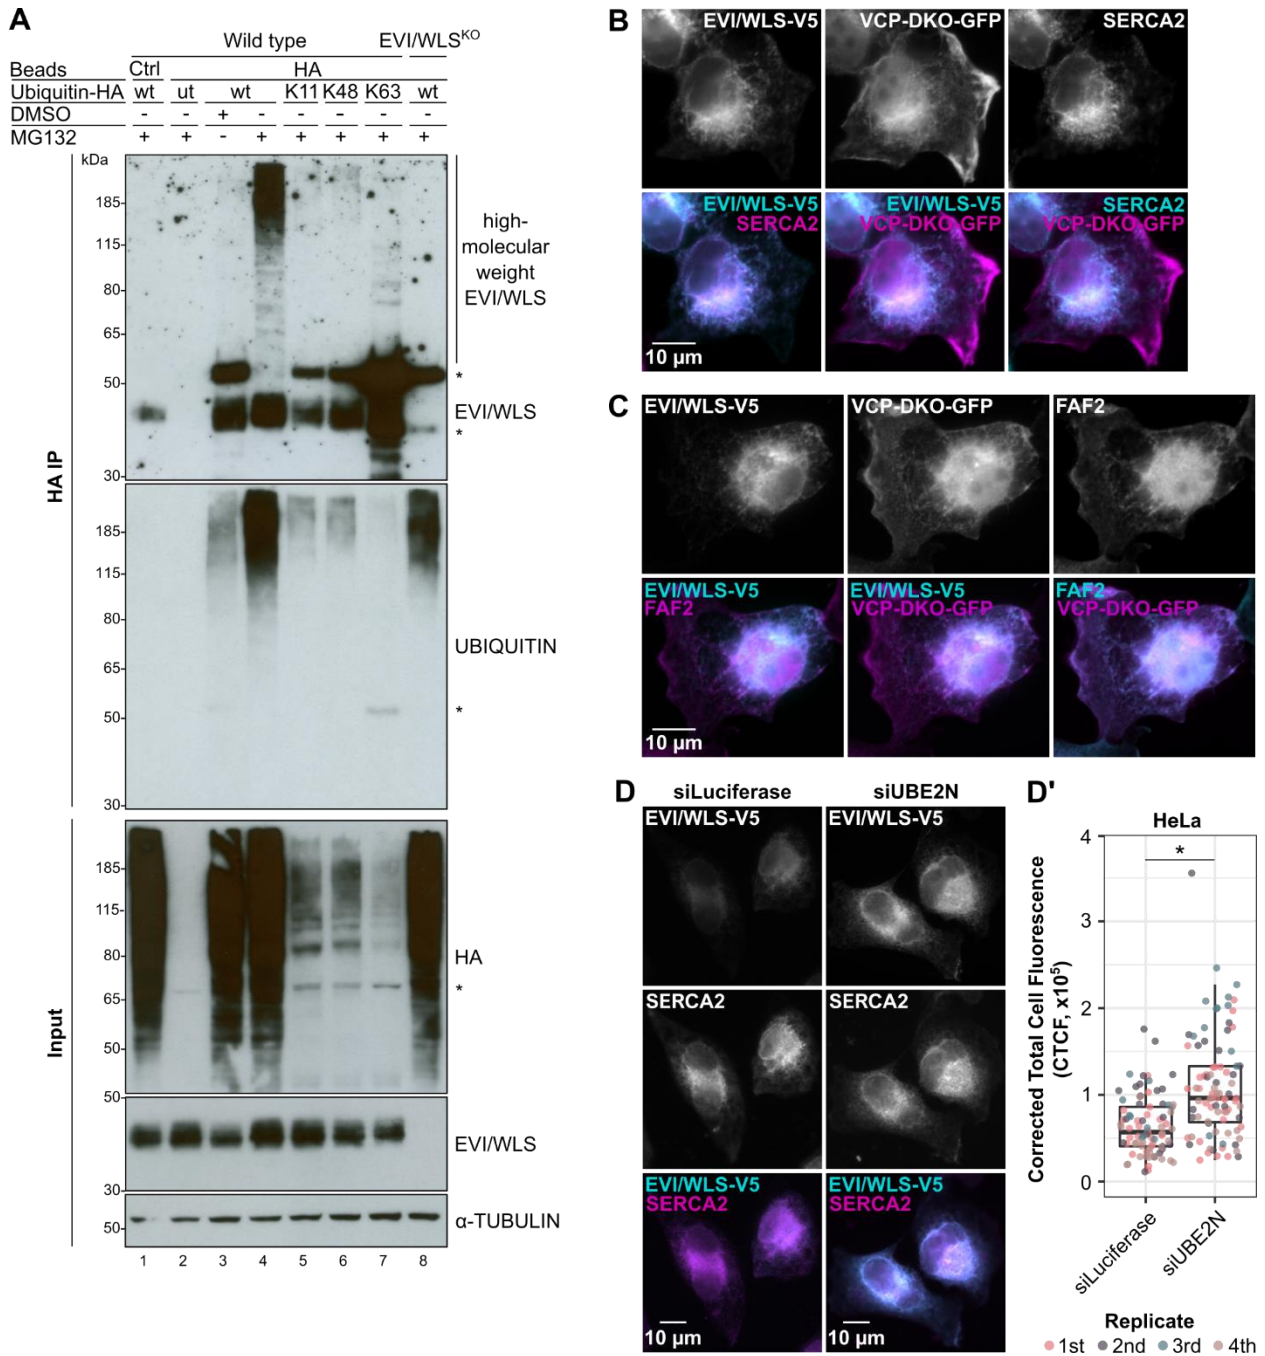

**Fig. S6. EVI/WLS is modified with K11-, K48-, and K68-linked ubiquitin and colocalises with VCP and FAF2 in the endoplasmic reticulum (ER)**

**A.** Endogenous EVI/WLS is modified with ubiquitin linked via K11, K48, and K63. A375 wild type (wt) and EVI/WLS knock-out (EVI/WLS<sup>KO</sup>) cells were transfected with pRK5-HA-Ubiquitin wt, K11, K48, or K63 overexpression plasmids or left untreated (ut). The K11, K48, and K63 ubiquitin constructs can only be elongated with further ubiquitins at the specified position, all others have been mutated to arginines. 24 h before harvest, samples were treated with the proteasome inhibitor MG132 (1  $\mu$ M) or equivalent volume of DMSO as solvent control. After 72 h, total cell lysates were sampled for input control or used for HA immunoprecipitation to analyse proteins modified with HA-tagged ubiquitin.  $\alpha$ -TUBULIN served as loading control. Asterisks mark nonspecific signals. Western blots are representative of three independent experiments. kDa = kilodalton

**B, C.** EVI/WLS-V5 colocalises with VCP-DKO-EGFP and FAF2 in the ER. HeLa cells seeded on cover glasses were transfected with EVI/WLS-V5 and a catalytically dead mutant form of VCP-EGFP (VCP-DKO-GFP) the next day. Again 24 h later, cells were fixed with 4% paraformaldehyde/PBS and stained for V5 (EVI/WLS) and FAF2 or SERCA2 as ER marker. Images were acquired using a Zeiss motorised inverted Observer.Z1 microscope with the ZEISS ZEN (blue edition) software and processed using Fiji (Fiji is just ImageJ). Image brightness and contrast were adjusted. Shown are representative images of three independent experiments. Scale bar is 10  $\mu$ m.

**D.** EVI/WLS-V5 accumulates in the ER after transfection of siUBE2N. HeLa cells were transfected with siUBE2N and seeded on cover glasses 24 h later. The next day, cells were additionally transfected with EVI/WLS-V5. Again 24 h later, cells were fixed with 4%

paraformaldehyde/PBS and stained for V5 (EVI/WLS) and SERCA2 as ER marker. Images were acquired using a Zeiss motorised inverted Observer.Z1 microscope with the ZEISS ZEN (blue edition) software. A total of  $n = 84$  (siLuciferase) and  $n = 88$  (siUBE2N) cells were imaged in four independent experiments and their corrected total cell fluorescence (CTCF) was analysed using Fiji (Fiji is just ImageJ). **D'** Shown are representative images where brightness and contrast were adjusted. Scale bar is  $10 \mu\text{m}$ . **D''** Each dot represents an individual cell and replicates are indicated by dot colour. Two-Sample Wilcoxon test, two-sided, \*  $p\text{-value} = 3.479\text{e-}08$

**Table S1. Summarised results of the low-throughput screen**

Observed phenotypes on EVI/WLS protein abundance in HEK293T and A375 cells after knock-down of indicated target genes. Data derived from this study or from Glaeser et al., 2018. - no effect; + weak or variable effects; ++ strong upregulation

|                                         | Gene                                          | Abbreviation                                      | NCBI    |           | Cell line | Results              | Reference            |
|-----------------------------------------|-----------------------------------------------|---------------------------------------------------|---------|-----------|-----------|----------------------|----------------------|
|                                         |                                               |                                                   | gene ID | UniProtKB |           |                      |                      |
| <b>Substrate recognition</b>            | ERLEC1                                        | Endoplasmic reticulum lectin 1                    | 27248   | Q96DZ1    | HEK293T   | -/+                  | this work            |
|                                         | ERLIN1/SPFH1                                  | ER Lipid Raft Associated 1                        | 10613   | O75477    | HEK293T   | -                    | this work            |
|                                         | ERLIN2/SPFH2                                  | ER Lipid Raft Associated 2                        | 11160   | O94905    | HEK293T   | + / ++               | this work            |
|                                         |                                               |                                                   |         |           | A375      | +                    | this work            |
|                                         | OS9/ERLEC2                                    | OS9 Endoplasmic Reticulum Lectin                  | 10956   | Q13438    | HEK293T   | -                    | this work            |
|                                         | SEL1L/HRD3                                    | SEL1L Adaptor Subunit Of ERAD E3 Ubiquitin Ligase | 6400    | Q9UBV2    | HEK293T   | +                    | this work            |
|                                         |                                               |                                                   |         | A375      | +         | this work            |                      |
| <b>E2 ubiquitin conjugating enzymes</b> | UBE2D1                                        | Ubiquitin Conjugating Enzyme E2 D1                | 7321    | P51668    | HEK293T   | -                    | this work            |
|                                         | UBE2G1                                        | Ubiquitin Conjugating Enzyme E2 G1                | 7326    | P62253    | HEK293T   | -                    | this work            |
|                                         | UBE2G2                                        | Ubiquitin Conjugating Enzyme E2 G2                | 7327    | P60604    | HEK293T   | -                    | Glaeser et al., 2018 |
|                                         |                                               |                                                   |         |           | A375      | -/+                  | this work            |
|                                         | UBE2J1                                        | Ubiquitin Conjugating Enzyme E2 J1                | 51465   | Q9Y385    | HEK293T   | -                    | Glaeser et al., 2018 |
|                                         |                                               |                                                   |         |           | A375      | -                    | this work            |
|                                         | UBE2J2                                        | Ubiquitin Conjugating Enzyme E2 J2                | 118424  | Q8N2K1    | HEK293T   | ++                   | Glaeser et al., 2018 |
|                                         |                                               |                                                   |         |           | A375      | ++                   | this work            |
|                                         | UBE2K                                         | Ubiquitin Conjugating Enzyme E2 K                 | 3093    | P61086    | HEK293T   | ++                   | this work            |
|                                         |                                               |                                                   |         |           | A375      | +                    | this work            |
| UBE2N/UBC13                             | Ubiquitin Conjugating Enzyme E2 N             | 7334                                              | P61088  | HEK293T   | + / ++    | this work            |                      |
|                                         |                                               |                                                   |         | A375      | +         | this work            |                      |
| UBE2U                                   | Ubiquitin Conjugating Enzyme E2 U             | 148581                                            | Q5VVX9  | HEK293T   | -         | Glaeser et al., 2018 |                      |
|                                         |                                               |                                                   |         | A375      | -         | this work            |                      |
| <b>E3 ubiquitin ligases</b>             | AMFR/GP78/RNF45                               | Autocrine Motility Factor Receptor                | 267     | Q9UKV5    | HEK293T   | -/+                  | Glaeser et al., 2018 |
|                                         |                                               |                                                   |         |           | A375      | +                    | this work            |
|                                         | CGRRF1/RNF197                                 | Cell Growth Regulator With Ring Finger Domain 1   | 10668   | Q99675    | HEK293T   | ++                   | Glaeser et al., 2018 |
|                                         |                                               |                                                   |         |           | A375      | ++                   | this work            |
|                                         | HRD1/SYVN1                                    | Synoviolin 1                                      | 84447   | Q86TM6    | HEK293T   | -                    | Glaeser et al., 2018 |
|                                         |                                               |                                                   |         |           | A375      | -                    | this work            |
|                                         | MARCH4/RNF174                                 | Membrane Associated Ring-CH-Type Finger 4         | 57574   | Q9P2E8    | HEK293T   | -                    | Glaeser et al., 2018 |
|                                         |                                               |                                                   |         |           | A375      | + / ++               | this work            |
|                                         | MARCH6/TEB4/RNF176                            | Membrane Associated Ring-CH-Type Finger 6         | 10299   | O60337    | HEK293T   | +                    | Glaeser et al., 2018 |
|                                         |                                               |                                                   |         |           | A375      | -/+                  | this work            |
|                                         | RNF5                                          | Ring Finger Protein 5                             | 6048    | Q99942    | HEK293T   | -/+                  | Glaeser et al., 2018 |
|                                         |                                               |                                                   |         |           | A375      | +                    | this work            |
|                                         | RNF24                                         | Ring Finger Protein 24                            | 11237   | Q9Y225    | HEK293T   | -/+                  | this work            |
|                                         | RNF122                                        | Ring Finger Protein 122                           | 79845   | Q9H9V4    | HEK293T   | -/+                  | this work            |
| RNF128                                  | Ring Finger Protein 128                       | 79589                                             | Q8TEB7  | HEK293T   | -         | Glaeser et al., 2018 |                      |
|                                         |                                               |                                                   |         | A375      | -/+       | this work            |                      |
| RNF139/TRC8                             | Ring Finger Protein 139                       | 11236                                             | Q8WU17  | HEK293T   | +         | Glaeser et al., 2018 |                      |
|                                         |                                               |                                                   |         | A375      | -         | this work            |                      |
| RNF170                                  | Ring Finger Protein 170                       | 81790                                             | Q96K19  | HEK293T   | -         | Glaeser et al., 2018 |                      |
|                                         |                                               |                                                   |         | A375      | -         | this work            |                      |
| STUB1/CHIP                              | STIP1 homology and U-box containing protein 1 | 10273                                             | Q9UNE7  | HEK293T   | -         | this work            |                      |
|                                         |                                               |                                                   |         | A375      | -/+       | this work            |                      |
| UBE4B/UFD2                              | Ubiquitylation Factor E4B                     | 10277                                             | O95155  | HEK293T   | -         | this work            |                      |



|                                                   | <b>Gene</b>                               | <b>Abbreviation</b>                                         | <b>NCBI<br/>gene ID</b>                                        | <b>UniProtKB</b> | <b>Cell line</b> | <b>Results</b>   | <b>Reference</b>                  |           |
|---------------------------------------------------|-------------------------------------------|-------------------------------------------------------------|----------------------------------------------------------------|------------------|------------------|------------------|-----------------------------------|-----------|
| <b>Retrotrans-<br/>location/Dis-<br/>location</b> | DERL1                                     | Derlin 1                                                    | 79139                                                          | Q9BUN8           | HEK293T<br>A375  | +<br>-           | this work<br>this work            |           |
|                                                   | DERL2                                     | Derlin 2                                                    | 51009                                                          | Q9GZP9           | HEK293T          | +                | this work                         |           |
|                                                   | DERL3                                     | Derlin 3                                                    | 91319                                                          | Q96Q80           | HEK293T          | + / ++           | this work                         |           |
|                                                   | FAF2/ETEA/UBXD8                           | Fas Associated Factor Family Member 2                       | 23197                                                          | Q96CS3           | HEK293T<br>A375  | + / ++<br>+ / ++ | this work<br>this work            |           |
|                                                   | HM13/SPP                                  | Histocompatibility Minor 13/ Signal Peptide Peptidase       | 81502                                                          | Q8TCT9           | HEK293T<br>A375  | +<br>-           | this work<br>this work            |           |
|                                                   | NPLOC4/NPL4                               | NPL4 Homolog, Ubiquitin Recognition Factor                  | 55666                                                          | Q8TAT6           | HEK293T          | + / ++           | this work                         |           |
|                                                   | RHBDD1/RHBDL4                             | Rhomboid Domain Containing 1                                | 84236                                                          | Q8TEB9           | HEK293T<br>A375  | +<br>-           | this work<br>this work            |           |
|                                                   | UBAC2                                     | UBA Domain Containing 2                                     | 337867                                                         | Q8NBM4           | HEK293T          | +                | this work                         |           |
|                                                   | UBXN4/ERASIN/<br>UBXD2                    | UBX Domain Protein 4                                        | 23190                                                          | Q92575           | HEK293T<br>A375  | + / ++<br>+      | this work<br>this work            |           |
|                                                   | UBXN6/UBXD1                               | UBX Domain Protein 6                                        | 80700                                                          | Q9BZV1           | HEK293T          | + / ++           | this work                         |           |
|                                                   | UFD1/UFD1L                                | Ubiquitin Recognition Factor In ER Associated Degradation 1 | 7353                                                           | Q92890           | HEK293T          | + / ++           | this work<br>Glaeser et al., 2018 |           |
|                                                   | VCP/P97/CDC48                             | Valosin Containing Protein                                  | 7415                                                           | P55072           | HEK293T<br>A375  | ++<br>++         | this work                         |           |
|                                                   | <b>Delivery to<br/>the<br/>proteasome</b> | BAG6/BAT3/SCYTHE                                            | BAG Cochaperone 6                                              | 7917             | P46379           | HEK293T          | -                                 | this work |
|                                                   |                                           | HERPUD1/HERP                                                | Homocysteine Inducible ER Protein With Ubiquitin Like Domain 1 | 9709             | Q15011           | HEK293T          | +                                 | this work |
| NGLY/PNG1                                         |                                           | N-Glycanase 1                                               | 55768                                                          | Q96IV0           | HEK293T          | +                | this work                         |           |
| RAD23A                                            |                                           | RAD23 Homolog A, Nucleotide Excision Repair Protein         | 5886                                                           | P54725           | HEK293T          | - / +            | this work                         |           |
| RAD23B                                            |                                           | RAD23 Homolog B, Nucleotide Excision Repair Protein         | 5887                                                           | P54727           | HEK293T          | - / +            | this work                         |           |
| TMUB1/HOPS                                        |                                           | Transmembrane And Ubiquitin Like Domain Containing 1        | 83590                                                          | Q9BVT8           | HEK293T          | -                | this work                         |           |
| TMUB2                                             |                                           | Transmembrane And Ubiquitin Like Domain Containing 2        | 79089                                                          | Q71RG4           | HEK293T          | + / ++           | this work                         |           |
| UBQLN2/DSK2                                       |                                           | Ubiquilin 2                                                 | 29978                                                          | Q9UHD9           | HEK293T          | -                | this work                         |           |
| <b>Deubiquityl-<br/>ating<br/>enzymes</b>         | ATXN3                                     | Ataxin 3                                                    | 4287                                                           | P54252           | HEK293T          | -                | this work                         |           |
|                                                   | USP13                                     | Ubiquitin Specific Peptidase 13                             | 8975                                                           | Q92995           | HEK293T          | -                | this work                         |           |
|                                                   | USP19                                     | Ubiquitin Specific Peptidase 19                             | 10869                                                          | O94966           | HEK293T          | +                | this work                         |           |
|                                                   | USP25                                     | Ubiquitin Specific Peptidase 25                             | 29761                                                          | Q9UHP3           | HEK293T          | -                | this work                         |           |
|                                                   | USP50                                     | Ubiquitin Specific Peptidase 50                             | 373509                                                         | Q70EL3           | HEK293T          | + / ++           | this work                         |           |
|                                                   | VCIPI1                                    | Valosin Containing Protein Interacting Protein 1            | 80124                                                          | Q96JH7           | HEK293T          | -                | this work                         |           |
|                                                   | YOD1/OTUD2                                | YOD1 Deubiquitylase                                         | 55432                                                          | Q5VVQ6           | HEK293T          | -                | this work                         |           |

**Table S2. siRNA references used in this study**

| Target gene                          | siRNA number | Manufacturer | Reference      |
|--------------------------------------|--------------|--------------|----------------|
| EVI/WLS                              | 1            | Ambion       | s36745         |
| EVI/WLS                              | 3            | Ambion       | s36747         |
| siGENOME Non-Targeting siRNA Pool #1 | /            | Dharmacon    | D-001206-13-20 |
| siLuciferase/ RLuc Duplex siRNA      | /            | Dharmacon    | P-002070-01-20 |
| AMFR/GP78                            | 1            | Dharmacon    | D-006522-01    |
| AMFR/GP78                            | 2            | Dharmacon    | D-006522-02    |
| AMFR/GP78                            | 3            | Dharmacon    | D-006522-03    |
| AMFR/GP78                            | 4            | Dharmacon    | D-006522-04    |
| ATXN3                                | 1            | Dharmacon    | D-012013-01    |
| ATXN3                                | 2            | Dharmacon    | D-012013-02    |
| ATXN3                                | 3            | Dharmacon    | D-012013-03    |
| ATXN3                                | 4            | Dharmacon    | D-012013-04    |
| BAG6                                 | 1            | Dharmacon    | D-005062-01    |
| BAG6                                 | 2            | Dharmacon    | D-005062-02    |
| BAG6                                 | 3            | Dharmacon    | D-005062-03    |
| BAG6                                 | 4            | Dharmacon    | D-005062-04    |
| CGRRF1                               | 1            | Dharmacon    | D-006933-01    |
| CGRRF1                               | 2            | Dharmacon    | D-006933-02    |
| CGRRF1                               | 3            | Dharmacon    | D-006933-03    |
| CGRRF1                               | 4            | Dharmacon    | D-006933-04    |
| DERL1                                | 2            | Dharmacon    | D-010733-02    |
| DERL1                                | 3            | Dharmacon    | D-010733-03    |
| DERL1                                | 4            | Dharmacon    | D-010733-04    |
| DERL1                                | 18           | Dharmacon    | D-010733-18    |
| DERL2                                | 1            | Dharmacon    | D-010576-01    |
| DERL2                                | 2            | Dharmacon    | D-010576-02    |
| DERL2                                | 3            | Dharmacon    | D-010576-03    |
| DERL2                                | 4            | Dharmacon    | D-010576-04    |
| DERL3                                | 4            | Dharmacon    | D-032237-04    |
| DERL3                                | 5            | Dharmacon    | D-032237-05    |
| DERL3                                | 6            | Dharmacon    | D-032237-06    |
| DERL3                                | 7            | Dharmacon    | D-032237-07    |
| ERLIN1                               | 2            | Dharmacon    | D-015639-02    |
| ERLIN1                               | 18           | Dharmacon    | D-015639-18    |
| ERLIN1                               | 19           | Dharmacon    | D-015639-19    |
| ERLIN1                               | 20           | Dharmacon    | D-015639-20    |
| ERLIN2/SPFH2                         | 2            | Dharmacon    | D-017943-02    |
| ERLIN2/SPFH2                         | 3            | Dharmacon    | D-017943-03    |
| ERLIN2/SPFH2                         | 4            | Dharmacon    | D-017943-04    |
| ERLIN2/SPFH2                         | 5            | Dharmacon    | D-017943-05    |
| FAF2/ETEA/UBXD8                      | 1            | Dharmacon    | D-010649-01    |
| FAF2/ETEA/UBXD8                      | 3            | Dharmacon    | D-010649-03    |
| FAF2/ETEA/UBXD8                      | 4            | Dharmacon    | D-010649-04    |
| FAF2/ETEA/UBXD8                      | 17           | Dharmacon    | D-010649-17    |
| HERPUD1/HERP                         | 1            | Dharmacon    | D-020918-01    |
| HERPUD1/HERP                         | 2            | Dharmacon    | D-020918-02    |
| HERPUD1/HERP                         | 3            | Dharmacon    | D-020918-03    |
| HERPUD1/HERP                         | 4            | Dharmacon    | D-020918-04    |
| HM13/SPP                             | 4            | Dharmacon    | D-005896-4     |
| HM13/SPP                             | 5            | Dharmacon    | D-005896-5     |
| HM13/SPP                             | 6            | Dharmacon    | D-005896-6     |
| HM13/SPP                             | 19           | Dharmacon    | D-005896-19    |
| MARCH4                               | 2            | Dharmacon    | D-023172-02    |
| MARCH4                               | 3            | Dharmacon    | D-023172-03    |
| MARCH4                               | 5            | Dharmacon    | D-023172-05    |
| MARCH4                               | 6            | Dharmacon    | D-023172-06    |
| MARCH6                               | 1            | Dharmacon    | D-006925-01    |
| MARCH6                               | 2            | Dharmacon    | D-006925-02    |
| MARCH6                               | 3            | Dharmacon    | D-006925-03    |
| MARCH6                               | 4            | Dharmacon    | D-006925-04    |
| NGLY/PNG1                            | 1            | Dharmacon    | D-016457-01    |
| NGLY/PNG1                            | 2            | Dharmacon    | D-016457-02    |
| NGLY/PNG1                            | 3            | Dharmacon    | D-016457-03    |
| NGLY/PNG1                            | 4            | Dharmacon    | D-016457-04    |
| NPLOC4/NPL4                          | 2            | Dharmacon    | D-020796-02    |
| NPLOC4/NPL4                          | 3            | Dharmacon    | D-020796-03    |
| NPLOC4/NPL4                          | 4            | Dharmacon    | D-020796-04    |
| NPLOC4/NPL4                          | 17           | Dharmacon    | D-020796-17    |

| Target gene   | siRNA number | Manufacturer | Reference   |
|---------------|--------------|--------------|-------------|
| PORCN         | 1            | Dharmacon    | D-009613-01 |
| PORCN         | 2            | Dharmacon    | D-009613-02 |
| PORCN         | 3            | Dharmacon    | D-009613-03 |
| PORCN         | 4            | Dharmacon    | D-009613-04 |
| RAD23B        | 1            | Dharmacon    | D-011759-01 |
| RAD23B        | 2            | Dharmacon    | D-011759-02 |
| RAD23B        | 3            | Dharmacon    | D-011759-03 |
| RAD23B        | 4            | Dharmacon    | D-011759-04 |
| RHBDD1/RHBDL4 | 1            | Dharmacon    | D-019378-01 |
| RHBDD1/RHBDL4 | 2            | Dharmacon    | D-019378-02 |
| RHBDD1/RHBDL4 | 3            | Dharmacon    | D-019378-03 |
| RHBDD1/RHBDL4 | 4            | Dharmacon    | D-019378-04 |
| RNF128        | 1            | Dharmacon    | D-007061-01 |
| RNF128        | 4            | Dharmacon    | D-007061-04 |
| RNF128        | 17           | Dharmacon    | D-007061-17 |
| RNF128        | 18           | Dharmacon    | D-007061-18 |
| RNF139/TRC8   | 1            | Dharmacon    | D-006942-01 |
| RNF139/TRC8   | 2            | Dharmacon    | D-006942-02 |
| RNF139/TRC8   | 4            | Dharmacon    | D-006942-04 |
| RNF139/TRC8   | 17           | Dharmacon    | D-006942-17 |
| RNF170        | 1            | Dharmacon    | D-007078-01 |
| RNF170        | 2            | Dharmacon    | D-007078-02 |
| RNF170        | 3            | Dharmacon    | D-007078-03 |
| RNF170        | 4            | Dharmacon    | D-007078-04 |
| RNF5          | 1            | Dharmacon    | D-006558-01 |
| RNF5          | 2            | Dharmacon    | D-006558-02 |
| RNF5          | 3            | Dharmacon    | D-006558-03 |
| RNF5          | 18           | Dharmacon    | D-006558-18 |
| SEL1L         | 2            | Dharmacon    | D-004885-02 |
| SEL1L         | 3            | Dharmacon    | D-004885-03 |
| SEL1L         | 4            | Dharmacon    | D-004885-04 |
| SEL1L         | 5            | Dharmacon    | D-004885-05 |
| STUB1/CHIP    | 2            | Dharmacon    | D-007201-02 |
| STUB1/CHIP    | 3            | Dharmacon    | D-007201-03 |
| STUB1/CHIP    | 5            | Dharmacon    | D-007201-05 |
| STUB1/CHIP    | 6            | Dharmacon    | D-007201-06 |
| SYFN/HRD1     | 1            | Dharmacon    | D-007090-01 |
| SYFN/HRD1     | 2            | Dharmacon    | D-007090-02 |
| SYFN/HRD1     | 3            | Dharmacon    | D-007090-03 |
| SYFN/HRD1     | 4            | Dharmacon    | D-007090-04 |
| TMUB2         | 1            | Dharmacon    | D-014307-01 |
| TMUB2         | 3            | Dharmacon    | D-014307-03 |
| TMUB2         | 4            | Dharmacon    | D-014307-04 |
| TMUB2         | 18           | Dharmacon    | D-014307-18 |
| UBAC2         | 1            | Dharmacon    | D-107914-01 |
| UBAC2         | 2            | Dharmacon    | D-107914-02 |
| UBAC2         | 3            | Dharmacon    | D-107914-03 |
| UBAC2         | 4            | Dharmacon    | D-107914-04 |
| UBE2G1        | 1            | Dharmacon    | D-010154-01 |
| UBE2G1        | 2            | Dharmacon    | D-010154-02 |
| UBE2G1        | 4            | Dharmacon    | D-010154-04 |
| UBE2G1        | 5            | Dharmacon    | D-010154-05 |
| UBE2G2        | 1            | Dharmacon    | D-009095-01 |
| UBE2G2        | 2            | Dharmacon    | D-009095-02 |
| UBE2G2        | 3            | Dharmacon    | D-009095-03 |
| UBE2G2        | 5            | Dharmacon    | D-009095-05 |
| UBE2J1        | 1            | Dharmacon    | D-007266-01 |
| UBE2J1        | 3            | Dharmacon    | D-007266-03 |
| UBE2J1        | 19           | Dharmacon    | D-007266-19 |
| UBE2J1        | 20           | Dharmacon    | D-007266-20 |
| UBE2J2        | 1            | Dharmacon    | D-008614-01 |
| UBE2J2        | 2            | Dharmacon    | D-008614-02 |
| UBE2J2        | 4            | Dharmacon    | D-008614-04 |
| UBE2J2        | 18           | Dharmacon    | D-008614-18 |
| UBE2K         | 17           | Dharmacon    | D-009431-17 |
| UBE2K         | 18           | Dharmacon    | D-009431-18 |
| UBE2K         | 19           | Dharmacon    | D-009431-19 |
| UBE2K         | 20           | Dharmacon    | D-009431-20 |
| UBE2N         | 1            | Dharmacon    | D-003920-01 |
| UBE2N         | 2            | Dharmacon    | D-003920-02 |
| UBE2N         | 4            | Dharmacon    | D-003920-04 |
| UBE2N         | 5            | Dharmacon    | D-003920-05 |

| Target gene                                                | siRNA number | Manufacturer | Reference   |
|------------------------------------------------------------|--------------|--------------|-------------|
| UBE2U                                                      | 1            | Dharmacon    | D-008998-01 |
| UBE2U                                                      | 2            | Dharmacon    | D-008998-02 |
| UBE2U                                                      | 3            | Dharmacon    | D-008998-03 |
| UBE2U                                                      | 4            | Dharmacon    | D-008998-04 |
| UBE2V1                                                     | 2            | Dharmacon    | D-010064-02 |
| UBE2V1                                                     | 21           | Dharmacon    | D-010064-21 |
| UBE2V1                                                     | 22           | Dharmacon    | D-010064-22 |
| UBE2V1                                                     | 23           | Dharmacon    | D-010064-23 |
| UBE2V2                                                     | 1            | Dharmacon    | D-008823-01 |
| UBE2V2                                                     | 2            | Dharmacon    | D-008823-02 |
| UBE2V2                                                     | 3            | Dharmacon    | D-008823-03 |
| UBE2V2                                                     | 4            | Dharmacon    | D-008823-04 |
| UBE4A                                                      | 1            | Dharmacon    | D-007200-01 |
| UBE4A                                                      | 2            | Dharmacon    | D-007200-02 |
| UBE4A                                                      | 3            | Dharmacon    | D-007200-03 |
| UBE4A                                                      | 4            | Dharmacon    | D-007200-04 |
| UBXN4/ERASIN/UBXD2                                         | 3            | Dharmacon    | D-014184-03 |
| UBXN4/ERASIN/UBXD2                                         | 4            | Dharmacon    | D-014184-04 |
| UBXN4/ERASIN/UBXD2                                         | 17           | Dharmacon    | D-014184-17 |
| UBXN4/ERASIN/UBXD2                                         | 18           | Dharmacon    | D-014184-18 |
| UBXN6/UBXD1                                                | 1            | Dharmacon    | D-008785-01 |
| UBXN6/UBXD1                                                | 2            | Dharmacon    | D-008785-02 |
| UBXN6/UBXD1                                                | 3            | Dharmacon    | D-008785-03 |
| UBXN6/UBXD1                                                | 4            | Dharmacon    | D-008785-04 |
| UFD1L/UFD1                                                 | 2            | Dharmacon    | D-017918-02 |
| UFD1L/UFD1                                                 | 3            | Dharmacon    | D-017918-03 |
| UFD1L/UFD1                                                 | 4            | Dharmacon    | D-017918-04 |
| UFD1L/UFD1                                                 | 17           | Dharmacon    | D-017918-17 |
| USP13                                                      | 1            | Dharmacon    | D-006064-01 |
| USP13                                                      | 2            | Dharmacon    | D-006064-02 |
| USP13                                                      | 3            | Dharmacon    | D-006064-03 |
| USP13                                                      | 4            | Dharmacon    | D-006064-04 |
| USP19                                                      | 3            | Dharmacon    | D-006068-03 |
| USP19                                                      | 4            | Dharmacon    | D-006068-04 |
| USP19                                                      | 5            | Dharmacon    | D-006068-05 |
| USP19                                                      | 6            | Dharmacon    | D-006068-06 |
| USP25                                                      | 2            | Dharmacon    | D-006074-02 |
| USP25                                                      | 3            | Dharmacon    | D-006074-03 |
| USP25                                                      | 4            | Dharmacon    | D-006074-04 |
| USP25                                                      | 5            | Dharmacon    | D-006074-05 |
| USP50                                                      | 2            | Dharmacon    | D-031837-2  |
| USP50                                                      | 3            | Dharmacon    | D-031837-3  |
| USP50                                                      | 4            | Dharmacon    | D-031837-4  |
| USP50                                                      | 17           | Dharmacon    | D-031837-17 |
| VCP                                                        | 5            | Dharmacon    | D-008727-05 |
| VCP                                                        | 6            | Dharmacon    | D-008727-06 |
| VCP                                                        | 7            | Dharmacon    | D-008727-07 |
| VCP                                                        | 8            | Dharmacon    | D-008727-08 |
| VCPIP1                                                     | 1            | Dharmacon    | D-019137-01 |
| VCPIP1                                                     | 2            | Dharmacon    | D-019137-02 |
| VCPIP1                                                     | 3            | Dharmacon    | D-019137-03 |
| VCPIP1                                                     | 4            | Dharmacon    | D-019137-04 |
| YOD1                                                       | 1            | Dharmacon    | D-027369-01 |
| YOD1                                                       | 2            | Dharmacon    | D-027369-02 |
| YOD1                                                       | 3            | Dharmacon    | D-027369-03 |
| YOD1                                                       | 4            | Dharmacon    | D-027369-04 |
| <b>siRNAs from Dharmacon Genomewide 96 well plates MTP</b> |              |              |             |
| ERLEC1                                                     | /            | Dharmacon    | M-010658-00 |
| OS9                                                        | /            | Dharmacon    | M-010811-00 |
| RAD23A                                                     | /            | Dharmacon    | M-005231-00 |
| RNF122                                                     | /            | Dharmacon    | M-007068-00 |
| RNF24                                                      | /            | Dharmacon    | M-006943-00 |
| TMUB1                                                      | /            | Dharmacon    | M-018578-00 |
| TMUB2                                                      | /            | Dharmacon    | M-014307-00 |
| UBAC2                                                      | /            | Dharmacon    | M-017914-00 |
| UBE2D1                                                     | /            | Dharmacon    | M-009387-01 |
| UBQLN2                                                     | /            | Dharmacon    | M-013566-00 |
| UFD2/UBE4B                                                 | /            | Dharmacon    | M-007202-01 |

**Table S3. Sequences of primers used for RT-qPCR**

| Target mRNA        | Forward primer sequence (5' -> 3') | Reverse primer sequence (5' -> 3') | Probe | Probe Reference |
|--------------------|------------------------------------|------------------------------------|-------|-----------------|
| ACTB               | CCAACCGCGAGAAGATGA                 | CCAGAGGCGTACAGGGATAG               | #64   | 4688635001      |
| AXIN2              | GCTGACGGATGATTCCATGT               | ACTGCCACACGATAAGGAG                | #56   | 4688538001      |
| ERLIN2/SPFH2       | GGAAGAAGGCGCTCATTG                 | TGAAATCTTCAGTCTCCTTC               | #29   | 4687612001      |
| EVI/WLS            | TCATGGTATTTTCAGGTGTTTCG            | GCATGAGGAACTTGAACCTAAAA            | #38   | 4687965001      |
| FAF2/ETEA/UBXD8    | GAAGGAGGAGGAGGTGCAA                | TCCTTTCTTTTCCTCCTGTAA              | #82   | 4689054001      |
| GAPDH              | AGCCACATCGCTCAGACAC                | GCCCAATACGACCAAATCC                | #60   | 4688589001      |
| NPLOC4             | CGGTTTACATCAATAGAAACAAGACT         | AACAACAAATCGCCATGCTT               | #25   | 4686993001      |
| PORCN              | GCTACTGCAAGGCTGTCTCC               | GCTTCAGGTAGGATGGCAAC               | #3    | 4685008001      |
| SDHA               | GGACCTGGTTGGTCTTTGGTC              | CCAGCGTTTGGTTAATTGG                | #80   | 4689038001      |
| UBE2K              | AGGACCTCCAGACACACCAT               | CGGACCTTAGGGGGATTA                 | #69   | 4688686001      |
| UBE2N              | CGCAGGATCATCAAGGAAA                | AAATAACGGGCGTTGCTCT                | #72   | 4688953001      |
| UBE2V1             | GGGCTCCAAGATTTTCAGTT               | AAGGCTGTATATTCGGTTTTTCATAA         | #82   | 4689054001      |
| UBE2V2             | ACAAGGTGGACAGGCATGAT               | TCTGGGTATTTAGGTCCACATTC            | #49   | 4688104001      |
| UBXN4/ERASIN/UBXD2 | CGCTTCGGTGGTACTGTTG                | TCCCAACAAGGTCCAAATGT               | #4    | 4685016001      |
| UBXN6              | CCTGGACAACATCCACCTG                | AGGCAGTTAATGCGCTCCT                | #63   | 4688627001      |
| UFD11/UFD1         | CAGCATGAGGAGTCGACAGA               | CCAGTCTATTGCCAGATCCAG              | #67   | 4688660001      |
| VCP                | AGAGGCAGACAAACCCATCA               | AGTGATCTCGACGGATCTCAG              | #35   | 4687680001      |
| WNT5A              | CAGTTCAAGACCGTGCAGAC               | ACGATCTCCGTGCACCTCTT               | #59   | 4688562001      |

**Table S4. Antibodies, TUBEs, and reagents for immunoprecipitations used in this study**

End. – endogenous; IF – Immunofluorescence staining; IP - Immunoprecipitation; WB – Western blot

| <b>Primary antibodies</b>                                                                   |                              |                |                        |                               |           |                           |
|---------------------------------------------------------------------------------------------|------------------------------|----------------|------------------------|-------------------------------|-----------|---------------------------|
| Target protein                                                                              | Reference                    | LOT            | Clonality              | Dilution (Application)        | Host      | Supplier                  |
| β-ACTIN                                                                                     | ab6276                       | GR3185620-6    | monoclonal (AC-15)     | 1/ 10 000 (WB)                | mouse     | Abcam                     |
| β-ACTIN                                                                                     | #4967                        | 8              | polyclonal             | 1/ 1 000 (WB)                 | rabbit    | Cell Signaling Technology |
| ERLIN2/SPFH2                                                                                | EB06896                      | G2 N201107     | polyclonal             | 1/ 1 000 (WB)                 | goat      | Everest Biotech           |
| ERLIN2/SPFH2                                                                                | #2959                        | 2              | polyclonal             | 1/ 50 (end. IP)               | rabbit    | Cell Signaling Technology |
| EVI/WLS                                                                                     | 655902                       | B225314        | monoclonal (YJ5)       | 1/250 - 1/ 1 000 (WB)         | mouse     | BioLegend                 |
| FAF2/ETEA/UBXD8                                                                             | GTX14759                     | 821702089      | polyclonal             | 1/ 1 000 (WB),<br>1/ 250 (IF) | goat      | GeneTex                   |
| FAF2/ETEA/UBXD8                                                                             | #34945                       | 1              | monoclonal (D8H6D)     | 1/ 200 (end. IP)              | rabbit    | Cell Signaling Technology |
| FLAG                                                                                        | F1804                        | SLBG5673V      | monoclonal (M2)        | 1/ 1 000 (WB)                 | mouse     | Sigma-Aldrich             |
| FLAG                                                                                        | F7425                        | 078M4886V      | polyclonal             | 1/ 8 000 (WB)                 | rabbit    | Sigma-Aldrich             |
| HSC70                                                                                       | sc-7298                      | D0218          | monoclonal (clone B-6) | 1/ 2 000 (WB)                 | mouse     | Santa Cruz Biotechnology  |
| K48-linkage Specific Polyubiquitin                                                          | #8081                        | 2              | monoclonal (D9D5)      | 1/ 100 000 (WB)               | rabbit    | Cell Signaling Technology |
| K63-linkage Specific Polyubiquitin                                                          | #5621                        | 5              | monoclonal (D7A11)     | 1/ 1 000 (WB)                 | rabbit    | Cell Signaling Technology |
| SEL1L                                                                                       | ab78298                      | GR215038-1     | polyclonal             | 1/1 000 (WB)                  | rabbit    | Abcam                     |
| SERCA2 ATPase                                                                               | ab2861                       | GR283954-6     | monoclonal (2A7-A1)    | 1/ 500 (IF)                   | mouse     | Abcam                     |
| α-TUBULIN                                                                                   | #2144                        | 6              | polyclonal             | 1/ 3 000 (WB)                 | rabbit    | Cell Signaling Technology |
| UBE2K/E2-25K                                                                                | MAB6609                      | CFHC0118071    | monoclonal (701316)    | 1/ 1 000 (WB)                 | mouse     | R&D Systems               |
| UBE2N                                                                                       | #6999                        | 1              | monoclonal (D2A1)      | 1/ 1 000 (WB)                 | rabbit    | Cell Signaling Technology |
| V5 Epitope Tag                                                                              | 600-401-378                  | 29087          | polyclonal             | 1/ 500 (IF)                   | rabbit    | Rockland                  |
| VCP/P97                                                                                     | ab11433                      | GR264288-5     | monoclonal (5)         | 1/ 100 000 (WB)               | mouse     | Abcam                     |
| VINCULIN                                                                                    | AB6039                       | <i>unknown</i> | polyclonal             | 1/ 150 000 (WB)               | rabbit    | Merck Millipore           |
| WNT3                                                                                        | GTX128100                    | 41171          | polyclonal             | 1/ 1 000 (WB)                 | rabbit    | GeneTex                   |
| WNT5A/B                                                                                     | #2530                        | 4              | monoclonal (C27E8)     | 1/ 1 000 (WB)                 | rabbit    | Cell Signaling Technology |
| <b>Horse-radish peroxidase (HRP)-coupled antibodies for Western blotting</b>                |                              |                |                        |                               |           |                           |
| Specificity                                                                                 | Reference                    | Host           | Clonality              | Conjugate                     | Dilution  | Supplier                  |
| β-ACTIN                                                                                     | SC47778 HRP                  | mouse          | monoclonal (C4)        | HRP                           | 1/ 5 000  | Santa Cruz Biotechnology  |
| Anti-Goat IgG                                                                               | 6160-05                      | rabbit         | polyclonal             | HRP                           | 1/ 5 000  | SouthernBiotech           |
| Anti-Mouse IgG (H+L)                                                                        | AB_10015289                  | goat           | polyclonal             | HRP                           | 1/ 10 000 | Jackson ImmunoResearch    |
| Anti-Rabbit IgG (H+L)                                                                       | AB_2313567                   | goat           | polyclonal             | HRP                           | 1/ 10 000 | Jackson ImmunoResearch    |
| <b>Fluorescence-protein coupled antibodies for immunofluorescence staining</b>              |                              |                |                        |                               |           |                           |
| Name                                                                                        | Conjugate                    | Dilution       | Reference              | Supplier                      |           |                           |
| Donkey anti-Rabbit IgG (H+L)                                                                | Alexa Fluor 488              | 1/ 500         | A-21206                | Thermo Fisher Scientific      |           |                           |
| Donkey anti-Rabbit IgG (H+L)                                                                | Alexa Fluor 555              | 1/ 500         | A-31572                | Thermo Fisher Scientific      |           |                           |
| Donkey anti-Mouse IgG (H+L)                                                                 | Alexa Fluor 647              | 1/ 500         | A-31571                | Thermo Fisher Scientific      |           |                           |
| Donkey anti-Goat IgG (H+L)                                                                  | Alexa Fluor 647              | 1/ 500         | A-21447                | Thermo Fisher Scientific      |           |                           |
| <b>Tandem Ubiquitin Binding Entities (TUBEs), immunoprecipitation, and control reagents</b> |                              |                |                        |                               |           |                           |
| Name                                                                                        | Specificity                  | Conjugate      | Reference              | Supplier                      |           |                           |
| TUBE Control                                                                                | Control                      | Agarose beads  | UM400                  | LifeSensors                   |           |                           |
| TUBE1                                                                                       | Pan-ubiquitin                | Magnetic beads | UM401M                 | LifeSensors                   |           |                           |
| TUBE2                                                                                       | Pan-ubiquitin                | Agarose beads  | UM402                  | LifeSensors                   |           |                           |
| K48-TUBE                                                                                    | K48-linked ubiquitin         | FLAG-tag       | UM607                  | LifeSensors                   |           |                           |
| K63-TUBE                                                                                    | K63-linked ubiquitin         | FLAG-tag       | UM604                  | LifeSensors                   |           |                           |
| M2 AFFINITY GEL                                                                             | Anti-FLAG                    | Agarose beads  | A2220                  | Sigma-Aldrich                 |           |                           |
| Monoclonal Anti-HA-Agarose                                                                  | Anti-HA                      | Agarose beads  | A2095                  | Sigma-Aldrich                 |           |                           |
| Dynabeads Protein G                                                                         | Immunoglobulin Fc-region     | Magnetic beads | 10004D                 | Life Technologies             |           |                           |
| BLUE SEPHAROSE 6 Fast Flow                                                                  | General protein purification | Sepharose      | 17-0948-01             | GE Healthcare                 |           |                           |
| Normal Rabbit Immunoglobulin                                                                | Control                      | N/A            | 500-P00                | PeptoTech                     |           |                           |
